# Supplementary material for: A Multi Omics Approach Unravels Metagenomic and Metabolic Alterations of a Probiotic and Synbiotic Additive in Rainbow Trout (Oncorhynchus Mykiss)
Source: Research Square preprint supplement (doi:10.21203/rs.3.rs-916019/v1), 2021-10-05
Supplement: Supplementary file 1 [file 4df126251f599cc9076b4b7e.xlsx]

## Sheet: Sheet1
Sample	qPCR Well	Plate	Dilution	CT value
CTRL.Feed 1	F5	6	1:1	22,42
CTRL.Feed 1	F11	6	1:10	21,98
CTRL.Feed 2	G5	6	1:1	27,52
CTRL.Feed 2	G11	6	1:10	22,32
CTRL.Feed 3	H5	6	1:1	28,61
CTRL.Feed 3	H11	6	1:10	23,41
CTRL.T01.F01.S4	D2	5	2:1	26,77
CTRL.T01.F01.S4	D6	5	1:1	33,58
CTRL.T01.F01.S4	D10	5	1:10	34,09
CTRL.T01.F02.S3	A4	5	2:1	42,5
CTRL.T01.F02.S3	A8	5	1:1	36,76
CTRL.T01.F02.S3	A12	5	1:10	39,52
CTRL.T01.F02.S4	C2	6	2:1	25,96
CTRL.T01.F02.S4	C8	6	1:1	28,55
CTRL.T01.F03.S3	G4	3	2:1	26,65
CTRL.T01.F03.S3	G8	3	1:1	39,36
CTRL.T01.F03.S3	G12	3	1:10	34,7
CTRL.T01.F03.S4	H1	3	2:1	32,4
CTRL.T01.F03.S4	H5	3	1:1	36,34
CTRL.T01.F03.S4	H9	3	1:10	32,68
CTRL.T01.F06.S3	D4	3	2:1	35,14
CTRL.T01.F06.S3	D8	3	1:1	32,96
CTRL.T01.F06.S3	D12	3	1:10	37,56
CTRL.T01.F10.S4	D4	5	2:1	35,47
CTRL.T01.F10.S4	D8	5	1:1	35,57
CTRL.T01.F10.S4	D12	5	1:10	34,7
CTRL.T01.F12.S4	D3	6	2:1	35,73
CTRL.T01.F12.S4	D9	6	1:10	26,43
CTRL.T01.F13.S4	H4	1	2:1	31,1
CTRL.T01.F13.S4	H8	1	1:1	34,24
CTRL.T01.F15.S3	B3	3	2:1	29,7
CTRL.T01.F15.S3	B7	3	1:1	40
CTRL.T01.F15.S3	B11	3	1:10	32,67
CTRL.T01.F15.S4	B3	1	2:1	31,63
CTRL.T01.F15.S4	B7	1	1:1	34,44
CTRL.T01.F15.S4	B11	1	1:10	34,86
CTRL.T01.F18.S4	D1	1	2:1	34,08
CTRL.T01.F18.S4	D5	1	1:1	36
CTRL.T01.F18.S4	D9	1	1:10	34,99
CTRL.T01.F27.S4	E2	6	2:1	24,03
CTRL.T01.F27.S4	E8	6	1:1	26,22
CTRL.T01.F28.S4	F2	1	2:1	33,84
CTRL.T01.F28.S4	F6	1	1:1	33,87
CTRL.T01.F28.S4	F10	1	1:10	33,65
CTRL.T01.F30.S3	C3	6	2:1	34,47
CTRL.T01.F30.S3	C9	6	1:10	31,06
CTRL.T01.F33.S4	D4	6	2:1	26,52
CTRL.T01.F33.S4	D10	6	1:10	27,64
CTRL.T01.F38.S3	C1	6	2:1	26,65
CTRL.T01.F38.S3	C7	6	1:1	29,68
CTRL.T01.F38.S4	E4	6	2:1	28,34
CTRL.T01.F38.S4	E10	6	1:10	25,87
Extraction Neg	F2	3	2:1	40
Extraction Neg	F6	3	1:1	37,06
Extraction Neg	F10	3	1:10	37,8
Extraction Neg	G4	6	2:1	38,3
Extraction Neg	H4	6	2:1	39,7
Extraction Neg	D6	6	1:1	35,6
Extraction Neg	H6	6	1:1	38,4
Extraction Neg	G10	6	1:10	40
Extraction Neg	H10	6	1:10	36,7
Extraction Neg	D12	6	1:10	37,04
Extraction Neg	H12	6	1:10	36,03
Library Blank	A3	1	2:1	40
Library Blank	F3	1	2:1	37,04
Library Blank	A4	1	2:1	40
Library Blank	A7	1	1:1	40
Library Blank	F7	1	1:1	40
Library Blank	A8	1	1:1	36,47
Library Blank	A11	1	1:10	36,92
Library Blank	F11	1	1:10	40
Library Blank	A12	1	1:10	40
Library Blank	F3	3	2:1	40
Library Blank	F7	3	1:1	37,06
Library Blank	F11	3	1:10	40
Library Blank	F4	6	2:1	35,19
Library Blank	F10	6	1:10	38,54
PCR Blank	H2	6	2:1	40
PCR Blank	H8	6	1:1	40
PCR.Blk.5	G2	1	2:1	40
PCR.Blk.5	G6	1	1:1	40
PCR.Blk.5	G10	1	1:10	40
PRO.Feed 1	A6	6	1:1	24,13
PRO.Feed 1	A12	6	1:10	26,34
PRO.Feed 2	B6	6	1:1	25,15
PRO.Feed 2	B12	6	1:10	26,86
PRO.Feed 3	C6	6	1:1	24,83
PRO.Feed 3	C12	6	1:10	29,06
PRO.T01.F02.S4	D2	3	2:1	34,78
PRO.T01.F02.S4	D6	3	1:1	33,17
PRO.T01.F02.S4	D10	3	1:10	34
PRO.T01.F04.S4	B4	1	2:1	34,59
PRO.T01.F04.S4	B8	1	1:1	34,43
PRO.T01.F04.S4	B12	1	1:10	32,01
PRO.T01.F05.S3	C1	1	2:1	35,47
PRO.T01.F05.S3	C5	1	1:1	36,47
PRO.T01.F05.S3	C9	1	1:10	34,52
PRO.T01.F05.S4	F1	6	2:1	33,08
PRO.T01.F05.S4	F7	6	1:1	33,35
PRO.T01.F06.S4	H3	5	2:1	33,97
PRO.T01.F06.S4	H7	5	1:1	40
PRO.T01.F06.S4	H11	5	1:10	34,88
PRO.T01.F11.S4	F4	1	2:1	31,87
PRO.T01.F11.S4	F8	1	1:1	35,99
PRO.T01.F11.S4	F12	1	1:10	40
PRO.T01.F17.S3	C3	5	2:1	39,92
PRO.T01.F17.S3	C7	5	1:1	36,36
PRO.T01.F17.S3	C11	5	1:10	35,55
PRO.T01.F20.S4	F3	5	2:1	34,98
PRO.T01.F20.S4	F7	5	1:1	40
PRO.T01.F20.S4	F11	5	1:10	37,28
PRO.T01.F21.S4	G4	1	2:1	35,9
PRO.T01.F21.S4	G8	1	1:1	33,74
PRO.T01.F22.S3	E1	6	2:1	31,82
PRO.T01.F22.S3	E7	6	1:1	33,75
PRO.T01.F22.S4	D3	1	2:1	35,25
PRO.T01.F22.S4	D7	1	1:1	32,41
PRO.T01.F22.S4	D11	1	1:10	32,84
PRO.T01.F23.S4	B4	6	2:1	31,51
PRO.T01.F23.S4	B10	6	1:10	32,59
PRO.T01.F24.S3	E1	3	2:1	40
PRO.T01.F24.S3	E5	3	1:1	40
PRO.T01.F24.S3	E9	3	1:10	30,65
PRO.T01.F25.S4	E2	5	2:1	40
PRO.T01.F25.S4	E6	5	1:1	34,26
PRO.T01.F25.S4	E10	5	1:10	42,74
PRO.T01.F27.S4	C4	6	2:1	32,42
PRO.T01.F27.S4	C10	6	1:10	32,4
PRO.T01.F29.S3	A1	6	2:1	33,06
PRO.T01.F29.S3	A7	6	1:1	34,78
PRO.T01.F30.S3	F2	6	2:1	31,44
PRO.T01.F30.S3	F8	6	1:1	33,32
PRO.T01.F32.S3	H3	3	2:1	36,75
PRO.T01.F32.S3	H7	3	1:1	31,8
PRO.T01.F32.S3	H11	3	1:10	37,87
PRO.T01.F32.S4	G2	3	2:1	40
PRO.T01.F32.S4	G6	3	1:1	35,9
PRO.T01.F32.S4	G10	3	1:10	34,49
PRO.T01.F33.S4	B3	5	2:1	37,94
PRO.T01.F33.S4	B7	5	1:1	40
PRO.T01.F33.S4	B11	5	1:10	33,46
PRO.T01.F34.S3	D4	1	2:1	33,75
PRO.T01.F34.S3	D8	1	1:1	34,73
PRO.T01.F34.S3	D12	1	1:10	22,56
PRO.T01.F35.S3	G1	6	2:1	31,93
PRO.T01.F35.S3	G7	6	1:1	34,82
PRO.T01.F35.S4	C2	1	2:1	36,35
PRO.T01.F35.S4	C6	1	1:1	37,46
PRO.T01.F35.S4	C10	1	1:10	40
PRO.T01.F39.S4	F1	5	2:1	34,96
PRO.T01.F39.S4	F5	5	1:1	36,1
PRO.T01.F39.S4	F9	5	1:10	35,85
qPCR BLANK	G12	1	1:10	40
qPCR BLANK	H12	1	1:10	40
qPCR BLANK	G12	5	1:10	40
qPCR BLANK	H12	5	1:10	40
SYN.Feed 1	E6	6	1:1	25,75
SYN.Feed 1	E12	6	1:10	26,92
SYN.Feed 2	F6	6	1:1	25,67
SYN.Feed 2	F12	6	1:10	25,51
SYN.Feed 3	G6	6	1:1	25,4
SYN.Feed 3	G12	6	1:10	26,3
SYN.T01.F01.S4	A3	5	2:1	39,83
SYN.T01.F01.S4	A7	5	1:1	40
SYN.T01.F01.S4	A11	5	1:10	37,99
SYN.T01.F02.S4	H1	6	2:1	32,76
SYN.T01.F02.S4	H7	6	1:1	34,63
SYN.T01.F04.S3	F1	1	2:1	32,89
SYN.T01.F04.S3	F5	1	1:1	33,98
SYN.T01.F04.S3	F9	1	1:10	24,96
SYN.T01.F04.S4	G2	6	2:1	33,77
SYN.T01.F04.S4	G8	6	1:1	34,66
SYN.T01.F05.S3	H3	1	2:1	38,14
SYN.T01.F05.S3	H7	1	1:1	32,87
SYN.T01.F05.S3	H11	1	1:10	21,2
SYN.T01.F05.S4	C1	3	2:1	40
SYN.T01.F05.S4	C5	3	1:1	29,77
SYN.T01.F05.S4	C9	3	1:10	34,24
SYN.T01.F06.S4	H4	5	2:1	36,97
SYN.T01.F06.S4	H8	5	1:1	36,17
SYN.T01.F10.S4	D1	5	2:1	28,02
SYN.T01.F10.S4	D5	5	1:1	33,52
SYN.T01.F10.S4	D9	5	1:10	36,49
SYN.T01.F11.S4	D3	3	2:1	34,17
SYN.T01.F11.S4	D7	3	1:1	34,66
SYN.T01.F11.S4	D11	3	1:10	34,93
SYN.T01.F12.S4	E2	1	2:1	40
SYN.T01.F12.S4	E6	1	1:1	29,87
SYN.T01.F12.S4	E10	1	1:10	40
SYN.T01.F22.S3	G1	5	2:1	36,88
SYN.T01.F22.S3	G5	5	1:1	40
SYN.T01.F22.S3	G9	5	1:10	37,05
SYN.T01.F23.S3	A3	3	2:1	40
SYN.T01.F23.S3	A7	3	1:1	40
SYN.T01.F23.S3	A11	3	1:10	36,06
SYN.T01.F23.S4	A2	6	2:1	28,43
SYN.T01.F23.S4	A8	6	1:1	32,85
SYN.T01.F29.S4	E4	3	2:1	40
SYN.T01.F29.S4	E8	3	1:1	40
SYN.T01.F29.S4	E12	3	1:10	35,93
SYN.T01.F33.S3	C3	1	2:1	35,16
SYN.T01.F33.S3	C7	1	1:1	40
SYN.T01.F33.S3	C11	1	1:10	33,69
SYN.T01.F34.S3	F1	3	2:1	28,68
SYN.T01.F34.S3	F5	3	1:1	38,49
SYN.T01.F34.S3	F9	3	1:10	33,48
SYN.T01.F36.S4	G3	3	2:1	37,69
SYN.T01.F36.S4	G7	3	1:1	37,18
SYN.T01.F36.S4	G11	3	1:10	36,28
SYN.T01.F38.S3	B1	5	2:1	36,94
SYN.T01.F38.S3	B5	5	1:1	33,67
SYN.T01.F38.S3	B9	5	1:10	32,92
Water sample 1	A5	6	1:1	26,99
Water sample 1	A11	6	1:10	29,61
Water sample 2	B5	6	1:1	28,17
Water sample 2	B11	6	1:10	25,12
Water sample 3	C5	6	1:1	30,68
Water sample 3	C11	6	1:10	31,57
Water sample 4	D5	6	1:1	30,51
Water sample 4	D11	6	1:10	27,82
Water sample 5	E5	6	1:1	27,13
Water sample 5	E11	6	1:10	24,23
